# Supplementary material
Source: publisher site journal article supplement (https://study.sagepub.com/sites/default/files/01%20Bloomberg%203e%20Appendix%20E.pdf)
Supplement: Supplementary file 1 [file 01%20Bloomberg%203e%20Appendix%20E.pdf]

## Appendix E. Sample Conceptual Framework

---

### **Preparedness for Dissertation Process**

- Very prepared
- Unprepared
- Somewhat prepared

### **Knowledge, Skills, Attitudes/KSA (what they think they needed)**

- Knowledge of content; knowing what they needed to do
- Understanding of the process; knowing how to do what they needed to do
- Assertiveness (being resourceful and self-directed)

### **How They Learned**

#### *Formal Learning*

- Course work
- Postcourse work seminars
- Advisors and other faculty

#### *Informal Learning*

- Dialogue with colleagues
- Researching
- Reading

### **Perceptions of Facilitators**

- Advisor
- Other faculty
- Colleagues/classmates
- Personal attributes

### **Perceptions of Impediments**

- Advisor
- Faculty/administration
- Rigidity of the process
- Personal and family issues
- Professional work demands
- Financial constraints
- Lack of confidence in ability
